# Supplementary material for: Impact of Different Enzymatic Processes on Antioxidant, Nutritional and Functional Properties of Soy Protein Hydrolysates Incorporated into Novel Cookies
Source: MDPI journal article supplement (doi:10.3390/foods12010024), 2022-12-21
Supplement: s1 [file s1]

**Supplementary Materials:** Supporting information may be found in the online version of this article (Table S1, Figures S1 and S2).

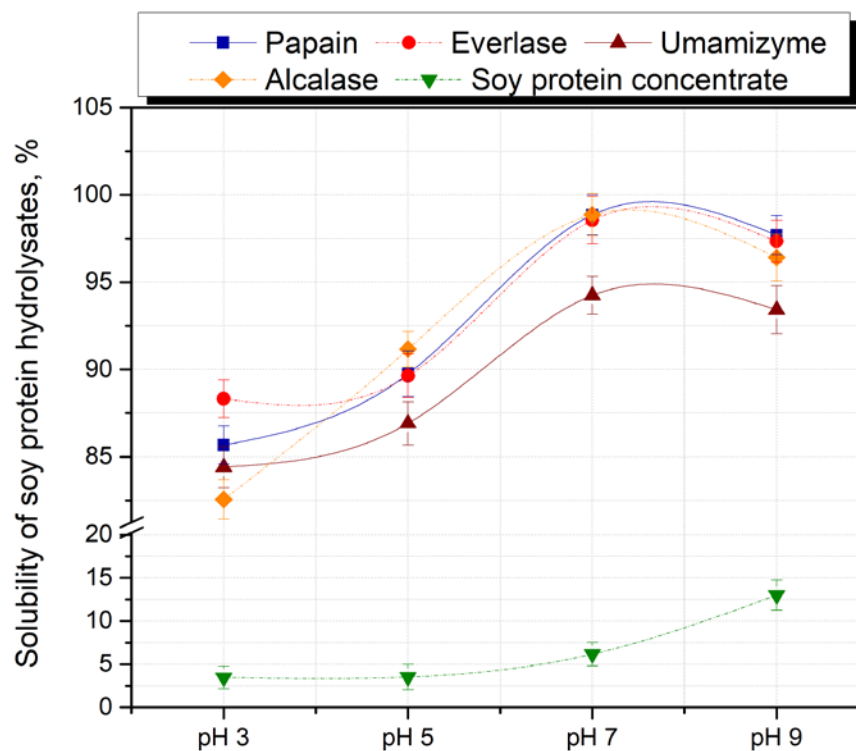

**Figure S1:** The solubility of soy protein hydrolysates obtained with different enzymes at different pH.

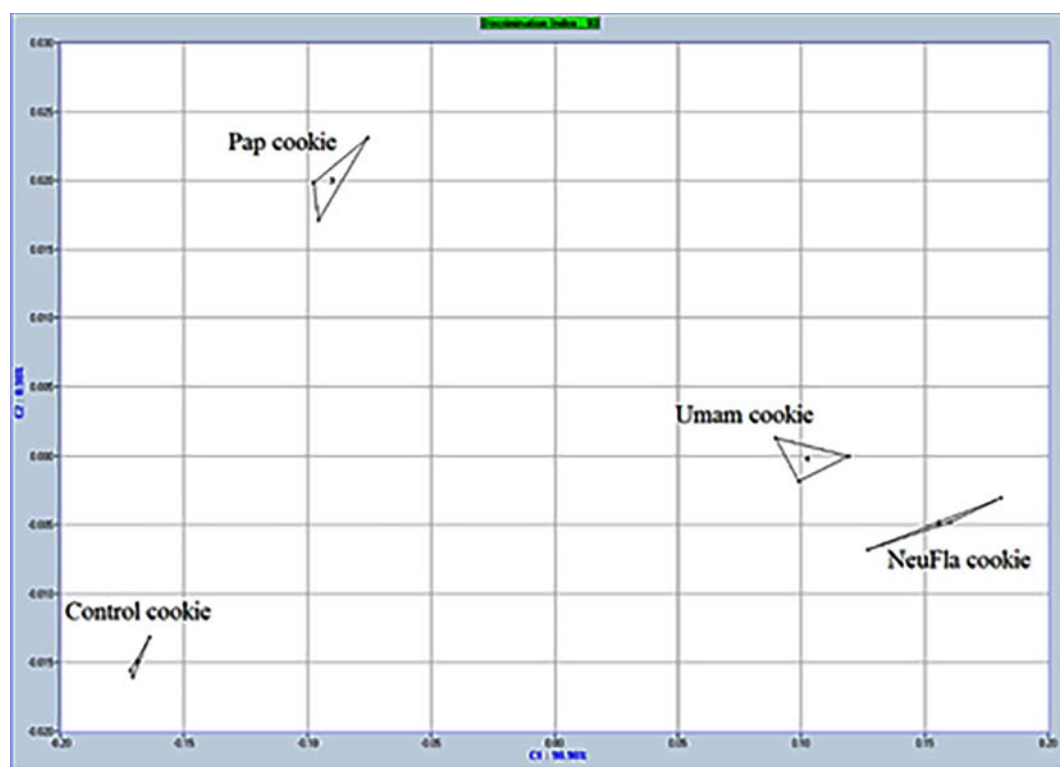

**Figure S2:** PCA plot of traditional cookie with wheat flour (control) and the cookie with added Pap, Umam and NeuFlav hydrolysates.

**Table S1:** Comparative results of amino acid composition of traditional cookie with wheat flour (control) and the cookie with added Pap, Umam and NeuFlav hydrolysates. Results are expressed as means  $\pm$  standard deviation ( $n = 2$ ).

|               | Amino acid content, g/100 g |                  |                  |                  |
|---------------|-----------------------------|------------------|------------------|------------------|
|               | SPC                         | Pap              | Umam             | NeuFlav          |
| Arginine      | 9.90 $\pm$ 0.08             | 11.3 $\pm$ 0.11  | 10.6 $\pm$ 0.09  | 10.9 $\pm$ 0.08  |
| Lysine        | 6.33 $\pm$ 0.04             | 7.15 $\pm$ 0.14  | 7.72 $\pm$ 0.10  | 7.66 $\pm$ 0.12  |
| Alanine       | 6.74 $\pm$ 0.06             | 9.09 $\pm$ 0.10  | 4.91 $\pm$ 0.15  | 6.10 $\pm$ 0.08  |
| Threonine     | 4.40 $\pm$ 0.04             | 4.73 $\pm$ 0.11  | 4.44 $\pm$ 0.08  | 4.66 $\pm$ 0.10  |
| Glycine       | 4.13 $\pm$ 0.04             | 4.24 $\pm$ 0.06  | 4.09 $\pm$ 0.06  | 4.22 $\pm$ 0.06  |
| Valine        | 4.95 $\pm$ 0.04             | 4.85 $\pm$ 0.12  | 5.73 $\pm$ 0.10  | 5.10 $\pm$ 0.09  |
| Serine        | 6.88 $\pm$ 0.08             | 7.03 $\pm$ 0.09  | 6.78 $\pm$ 0.10  | 7.10 $\pm$ 0.10  |
| Proline       | 11.00 $\pm$ 0.04            | 10.18 $\pm$ 0.09 | 10.64 $\pm$ 0.10 | 10.76 $\pm$ 0.08 |
| Isoleucine    | 3.99 $\pm$ 0.04             | 4.48 $\pm$ 0.09  | 5.03 $\pm$ 0.04  | 4.44 $\pm$ 0.10  |
| Leucine       | 8.67 $\pm$ 0.13             | 8.73 $\pm$ 0.11  | 9.24 $\pm$ 0.13  | 8.88 $\pm$ 0.80  |
| Methionine    | 1.65 $\pm$ 0.06             | 1.94 $\pm$ 0.06  | 0.82 $\pm$ 0.08  | 1.55 $\pm$ 0.06  |
| Histidine     | 1.38 $\pm$ 0.06             | 2.06 $\pm$ 0.10  | 1.87 $\pm$ 0.06  | 2.00 $\pm$ 0.06  |
| Phenylalanine | 3.99 $\pm$ 0.08             | 4.00 $\pm$ 0.11  | 4.09 $\pm$ 0.04  | 4.10 $\pm$ 0.04  |
| Glutamic acid | 18.70 $\pm$ 0.05            | 13.45 $\pm$ 0.12 | 16.14 $\pm$ 0.18 | 15.32 $\pm$ 0.08 |
| Aspartic acid | 3.58 $\pm$ 0.04             | 3.15 $\pm$ 0.04  | 4.56 $\pm$ 0.11  | 4.11 $\pm$ 0.05  |
| Cystine       | 1.24 $\pm$ 0.04             | 1.33 $\pm$ 0.02  | 0.82 $\pm$ 0.04  | 0.78 $\pm$ 0.09  |
| Tyrosine      | 2.48 $\pm$ 0.11             | 2.30 $\pm$ 0.14  | 2.46 $\pm$ 0.20  | 2.33 $\pm$ 0.30  |

|      |       |       |       |       |
|------|-------|-------|-------|-------|
| ΣΕΑΑ | 35.36 | 37.94 | 38.94 | 38.39 |
|------|-------|-------|-------|-------|
